# Supplementary figures and images for: Identification of 15 lncRNAs Signature for Predicting Survival Benefit of Advanced Melanoma Patients Treated with Anti-PD-1 Monotherapy
Source: MDPI journal article supplement (doi:10.3390/cells10050977), 2021-04-22

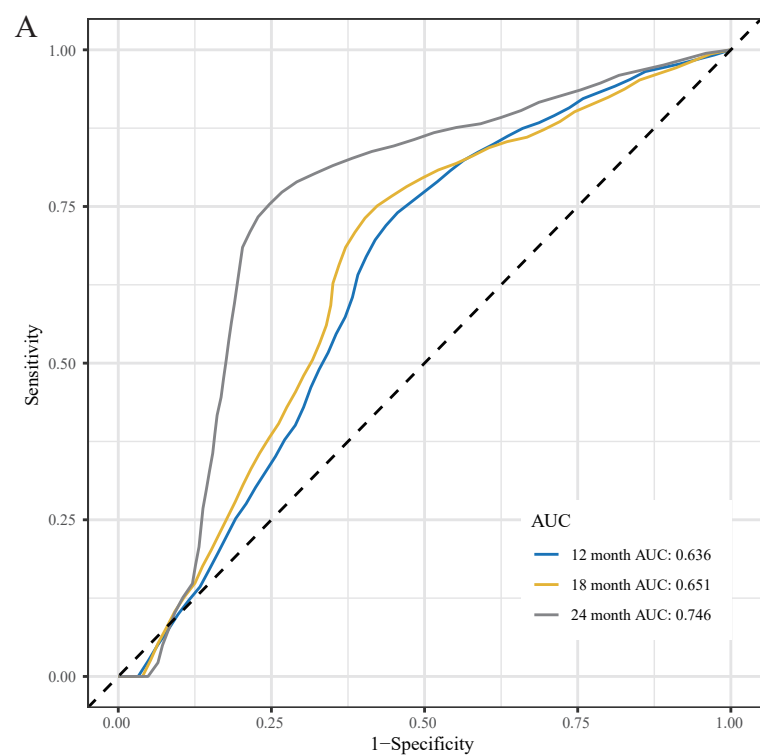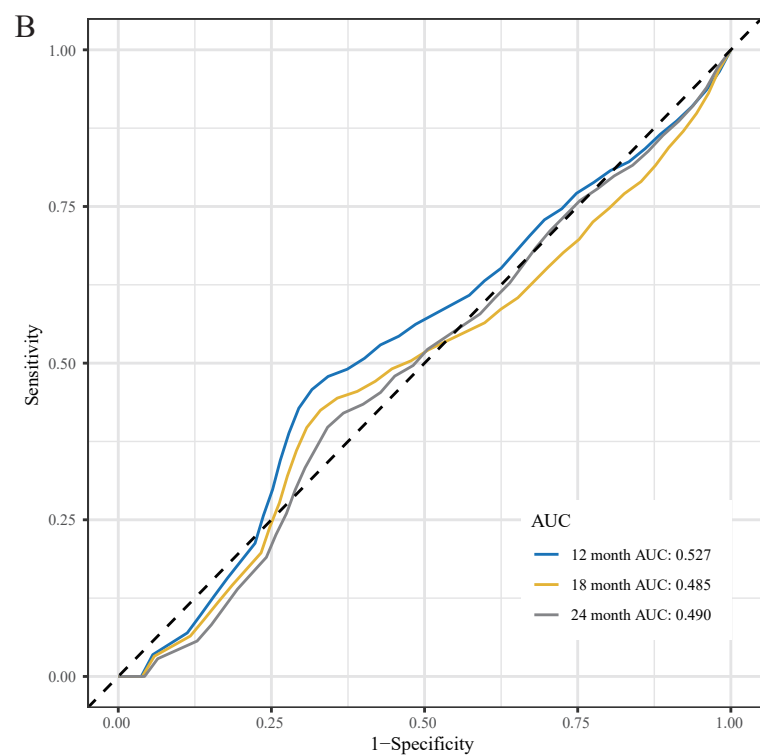

Supplement: s1 [file s1]

### Preservation Median rank

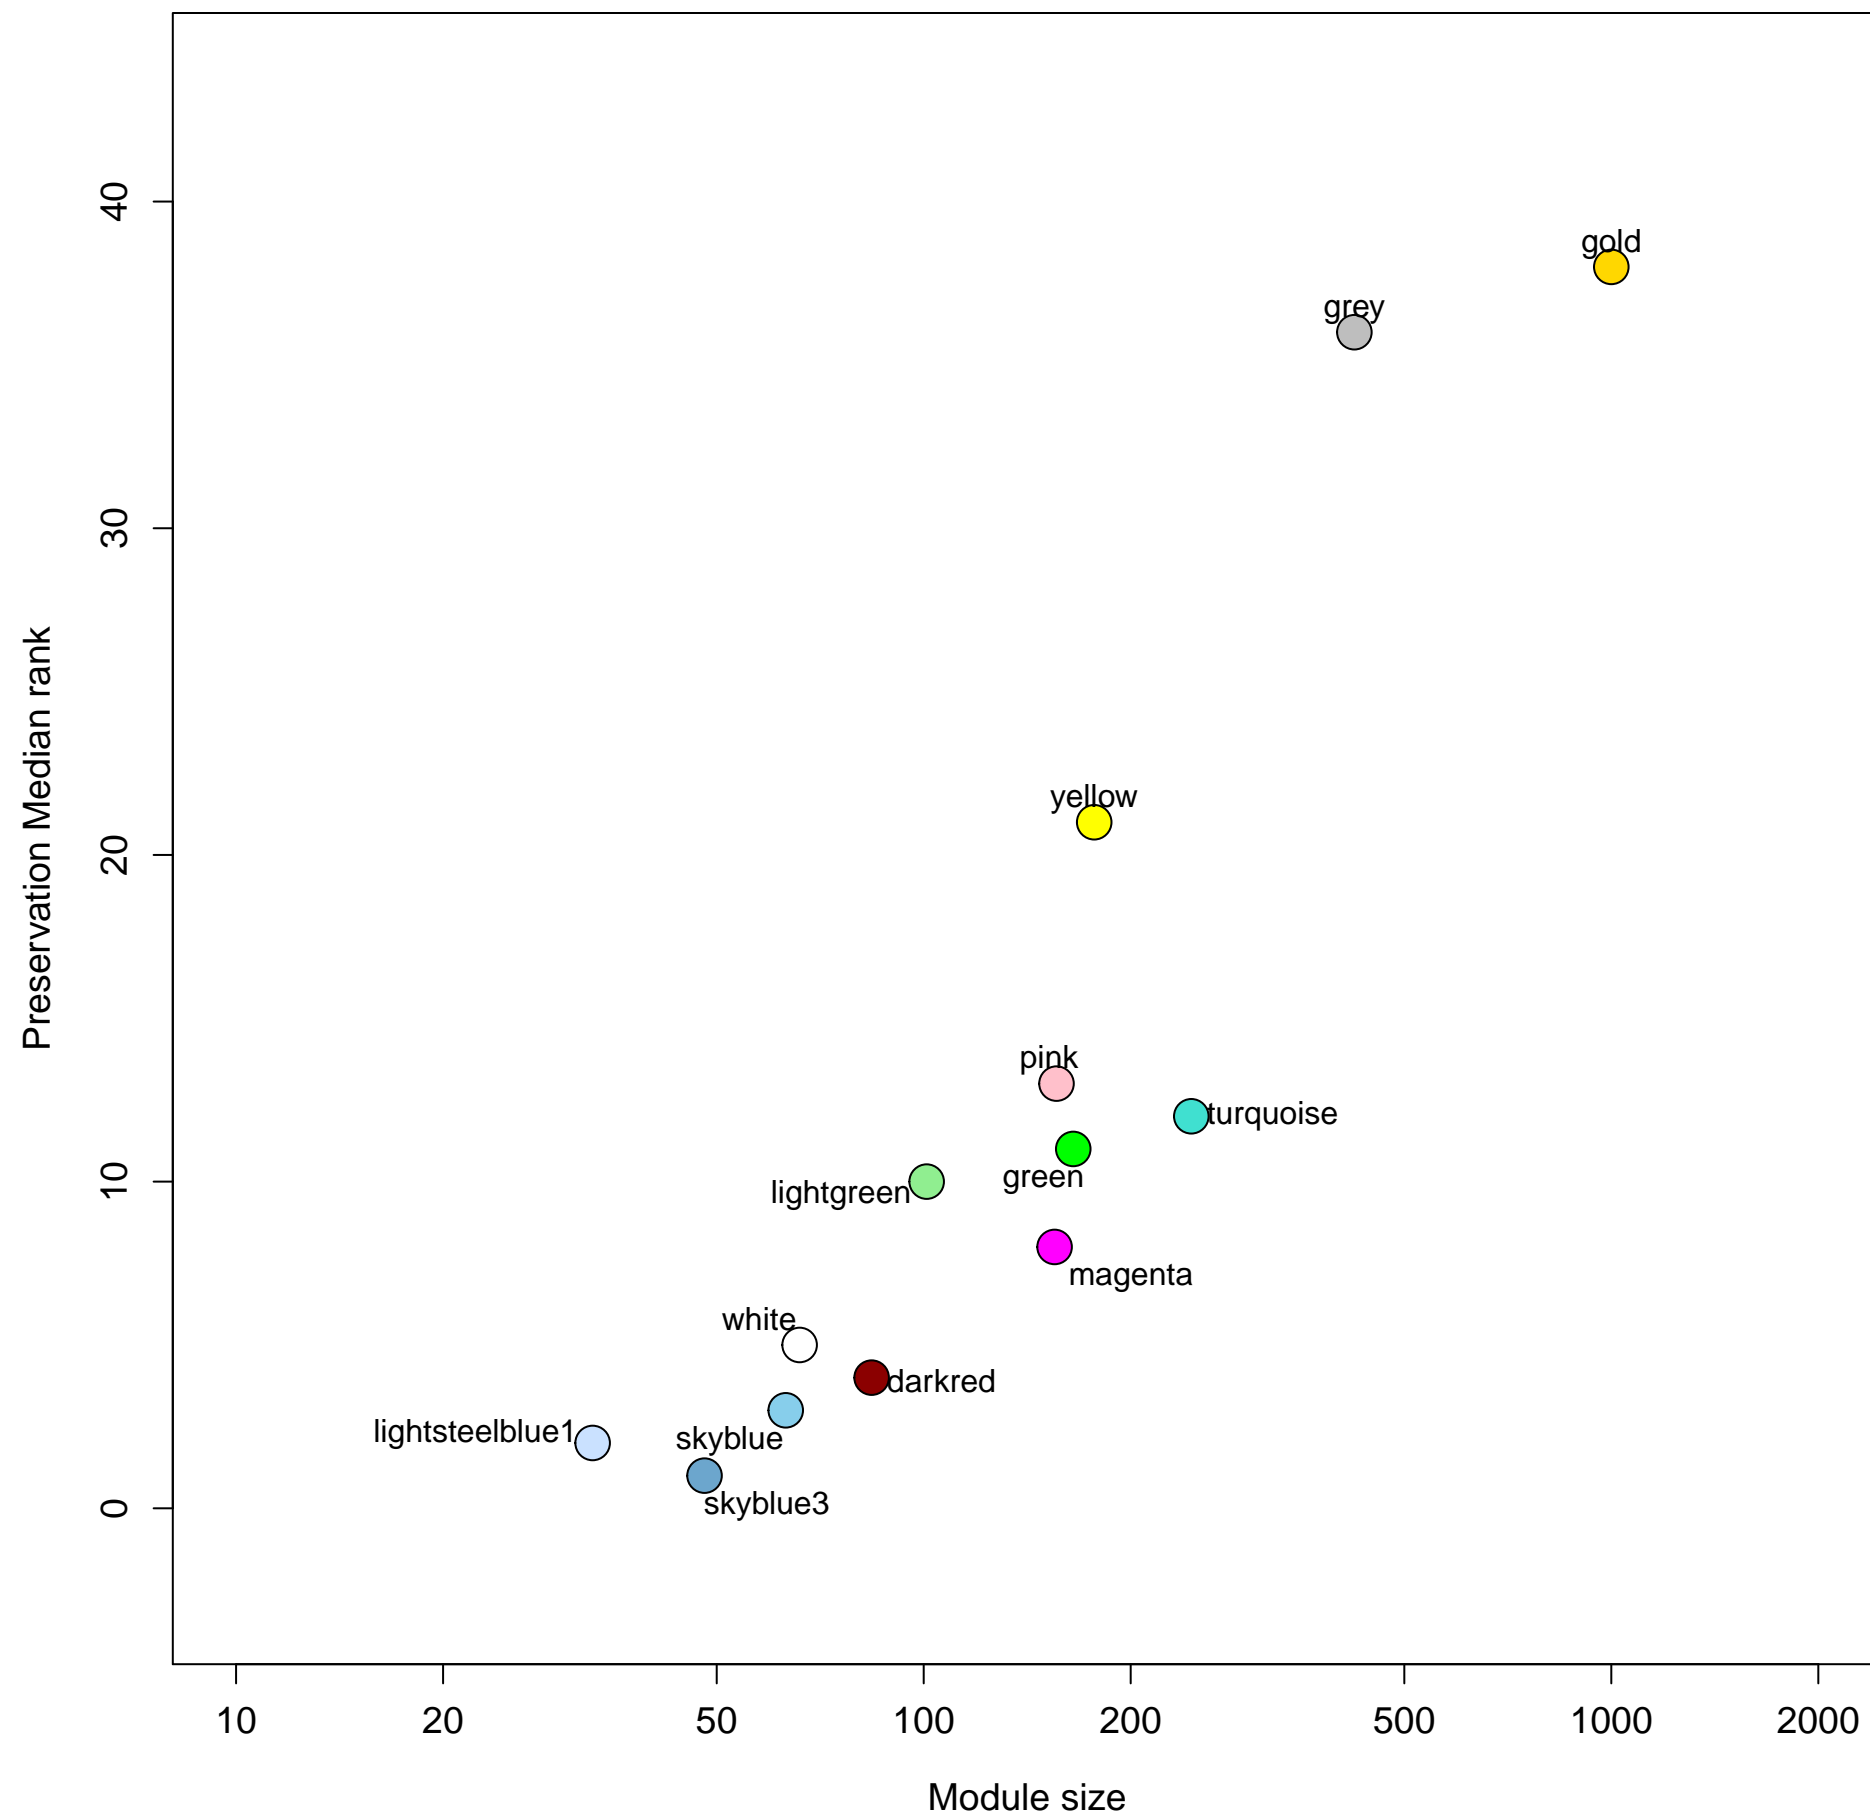

### Preservation Zsummary

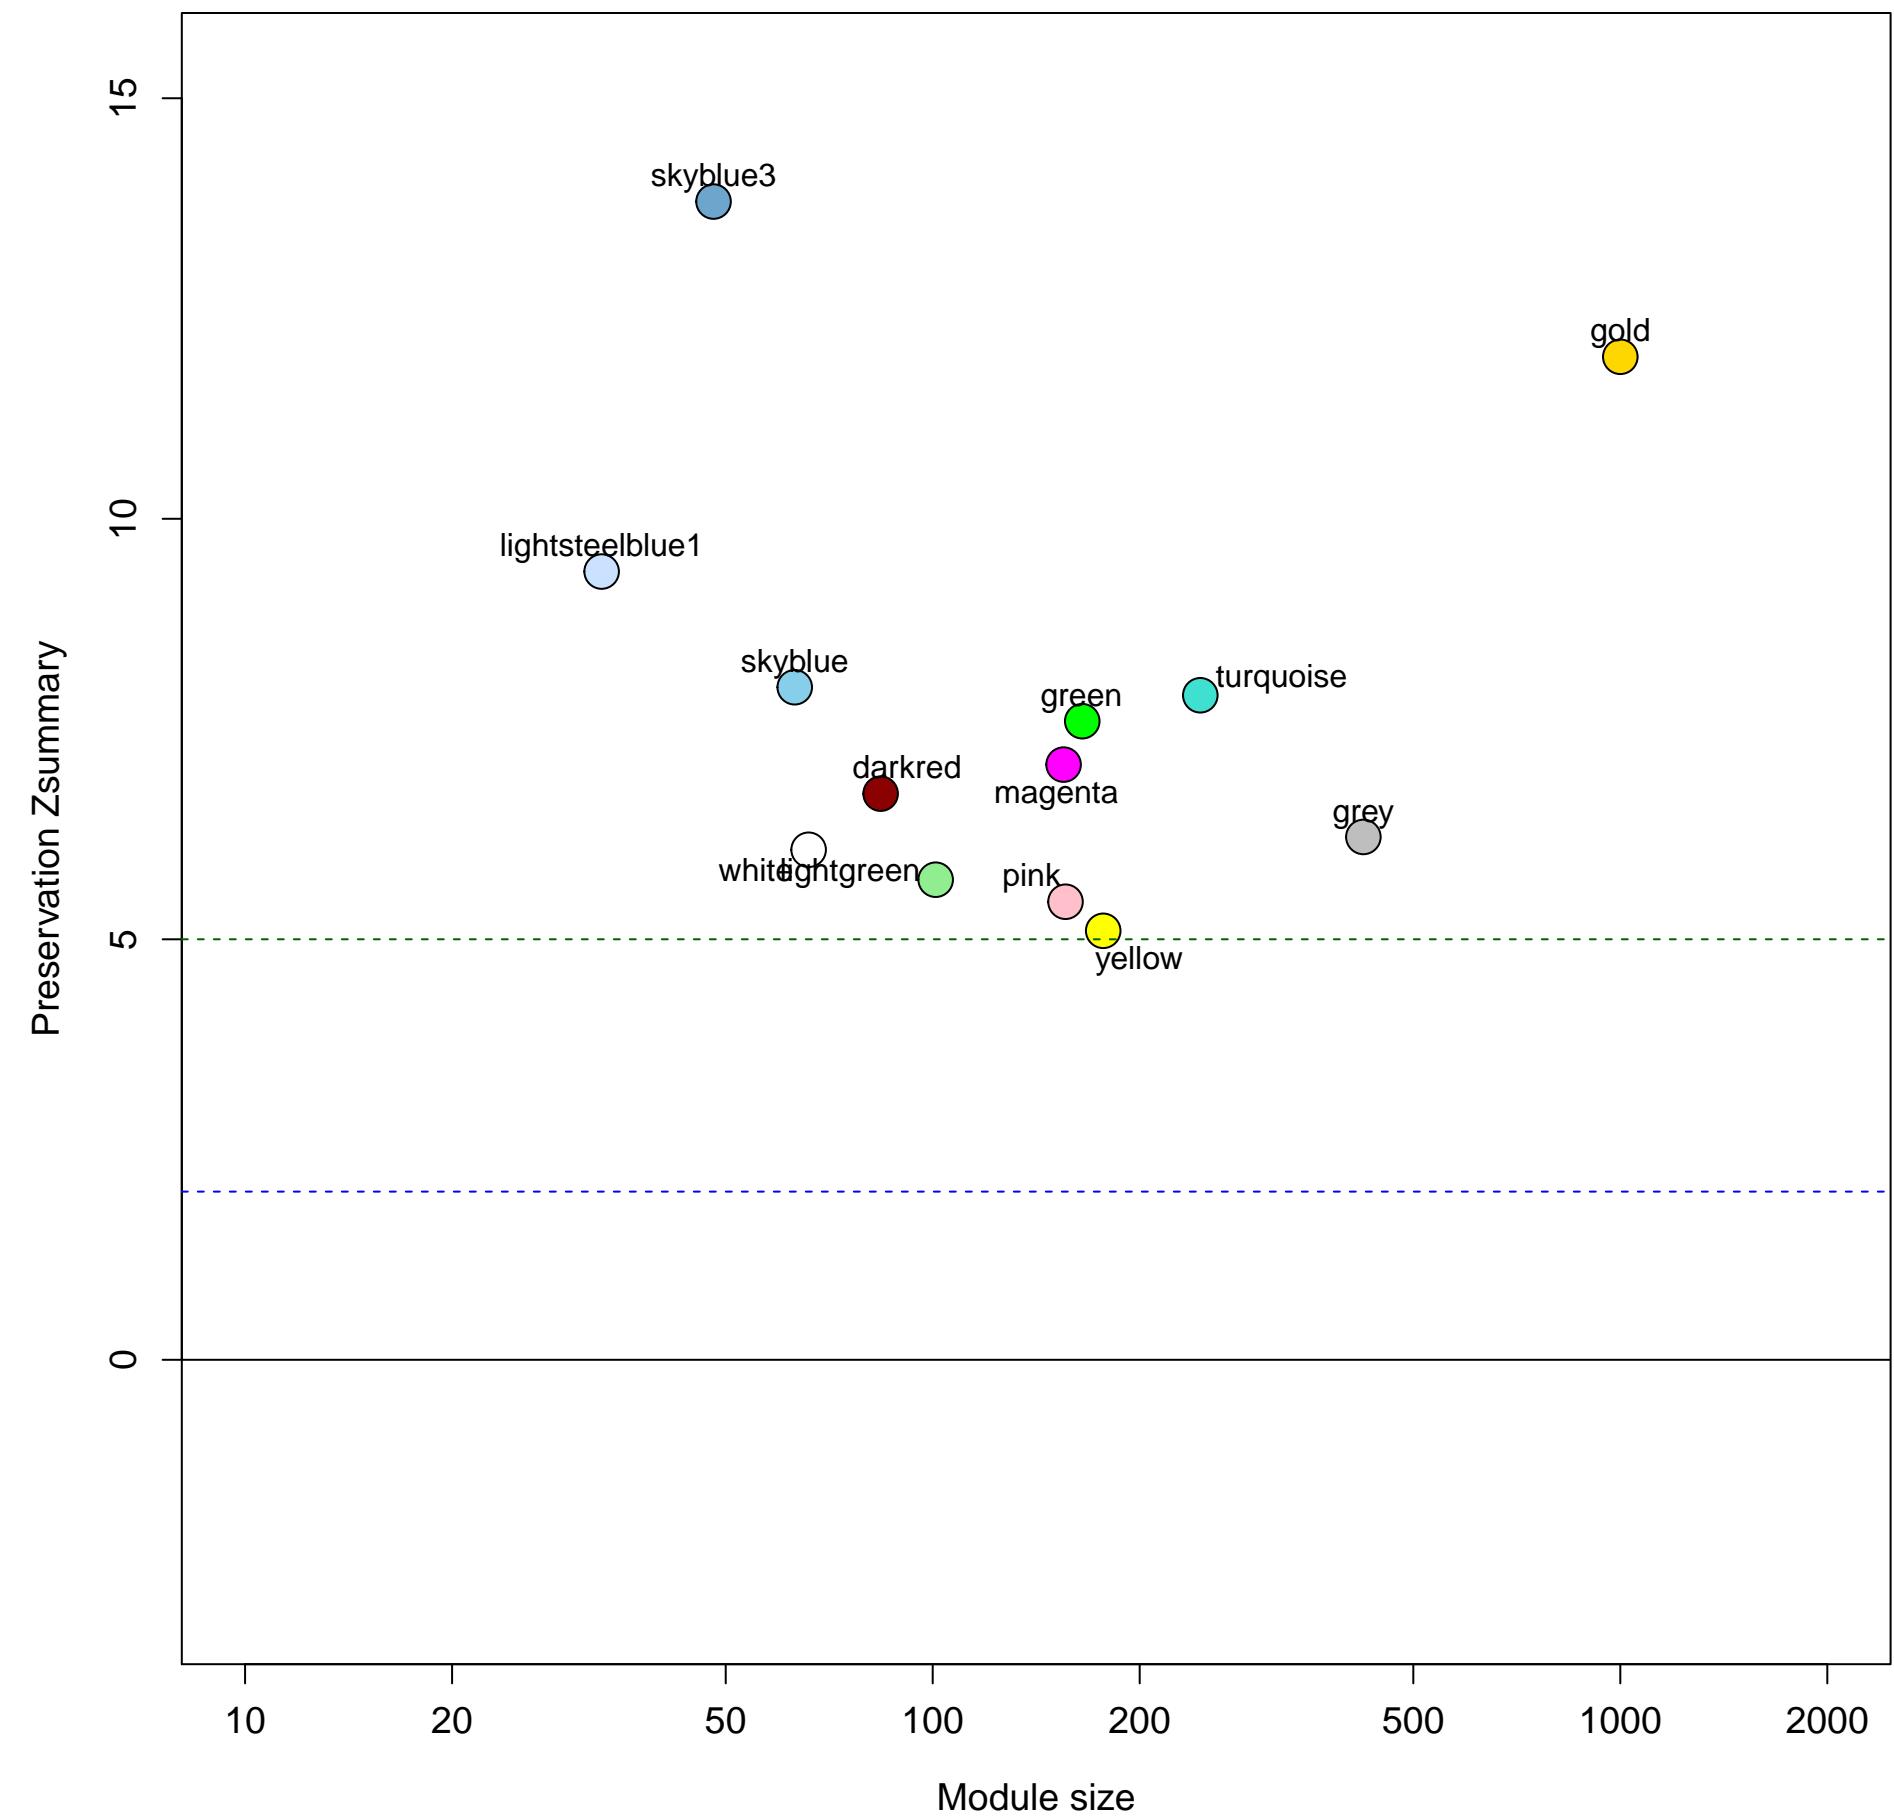

Supplement: s1 [file s1]
